# Supplementary material for: Facile fabrication of polyaniline@γ-MnOOH on a buckypaper ternary composite electrode for free-standing supercapacitors
Source: Royal Society of Chemistry journal article supplement (doi:10.1039/c7ra08431e), 2017-01-01
Supplement: c7ra08431e1.pdf [file c7ra08431e1.pdf]

## Supplementary information

### Contents

**Part 1.** The cross-sectional view of MBP electrode

**Part 2.** The cross-sectional view of PMBP electrode

**Part 3.** The CV curves of MBP, PBP,  $\gamma$ -MnOOH and PANI.

**Part 4.** The high-magnification SEM of PANI on the PMBP electrode

**Part 1.**

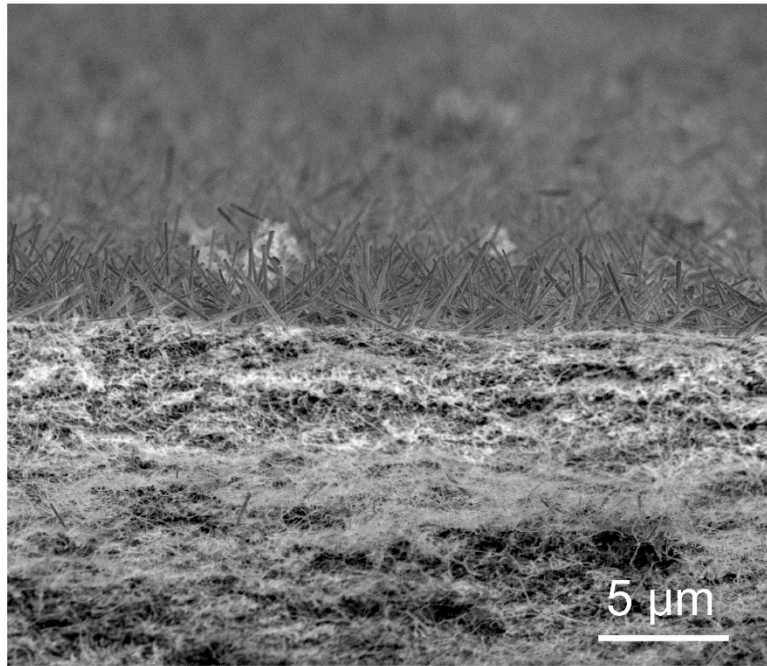

**Fig. S1.** The cross-sectional view of MBP

**Part 2.**

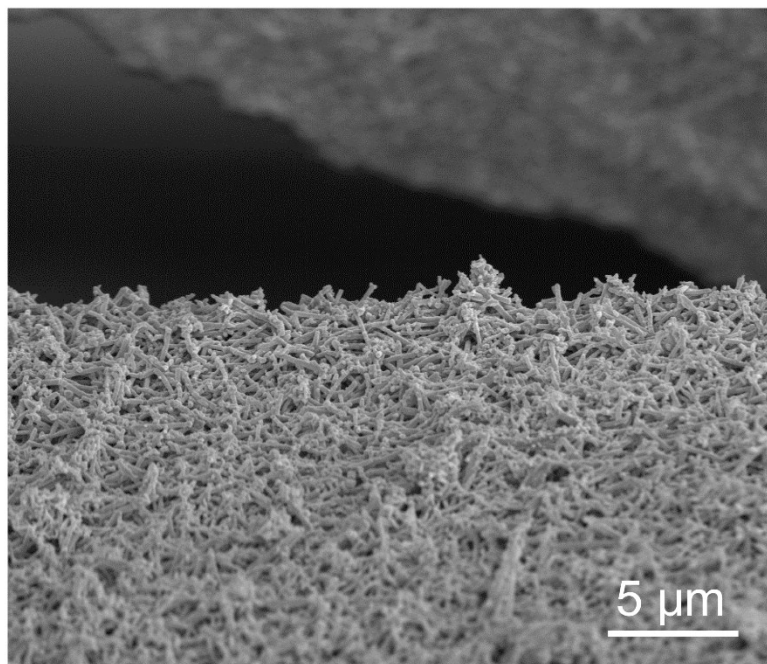

**Fig. S2.** The cross-sectional view of PMBP

**Part 3.**

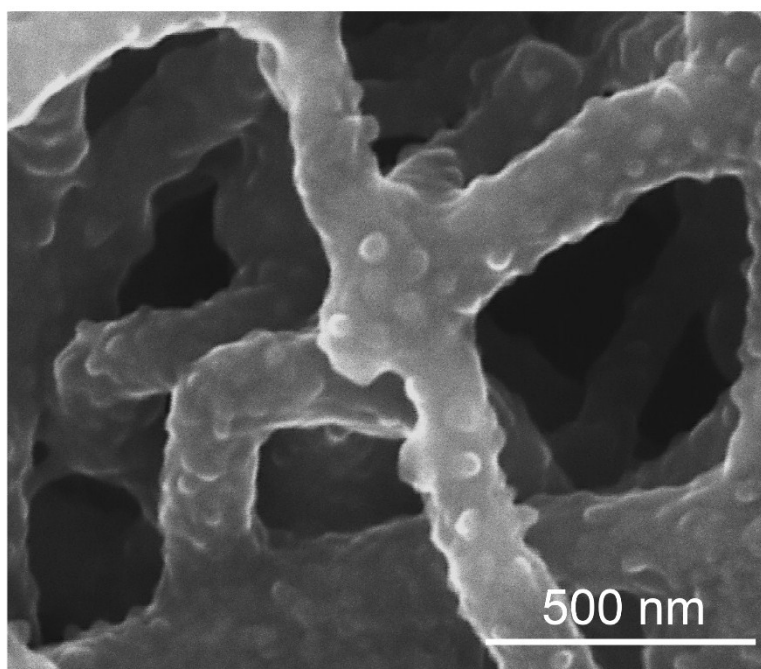

**Fig. S3.** The high-magnification SEM of PANI on the PMBP electrode

**Part 4.**

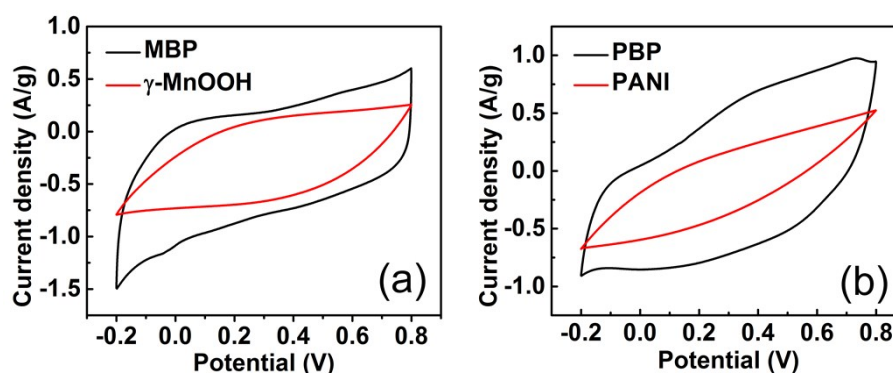

**Fig. S4.** The CV curves of (a) MBP and  $\gamma$ -MnOOH (b) PBP and PANI at the current density of  $5 \text{ mV s}^{-1}$
